# Supplementary material for: Self-assembled graphene/BUBD-1 hybrids for ultrasensitive organic phototransistors
Source: Royal Society of Chemistry journal article supplement (doi:10.1039/d2tc01352e), 2022-01-01
Supplement: d2tc01352e1.pdf [file d2tc01352e1.pdf]

## Self-assembled graphene/BUBD-1 hybrids for ultrasensitive organic phototransistors

Shuchao Qin,<sup>\*a</sup> Xue Qin,<sup>a</sup> Qianqian Du,<sup>a</sup> Yuquan Gan,<sup>a</sup> Yuting Zhang,<sup>a</sup> Anran  
Wang,<sup>b</sup> Xunling Yan,<sup>a</sup> Ruixin Dong,<sup>a</sup> Yunlong Liu,<sup>a</sup> Shuhong Li,<sup>a</sup> Cailong Liu,<sup>a</sup>  
Wenjun Wang,<sup>\*a</sup> and Fengqiu Wang<sup>\*b</sup>

<sup>a</sup>Key Laboratory of Optical Communication Science and Technology of Shandong  
Province, School of Physical Science and Information Engineering, Liaocheng  
University, Liaocheng 252059, China

<sup>b</sup>School of Electronic Science and Engineering and Key Laboratory of Intelligent  
Optical Sensing and Manipulation, Ministry of Education, Nanjing University,  
Nanjing 210093, China

Corresponding Authors:

\*E-mail: Shuchao Qin (lcqinshuchao@126.com); Qianqian Du (dzdq0126@163.com)

Wenjun Wang (phywwang@163.com); Fengqiu Wang (fwang@nju.edu.cn).

### S1. AFM image of BUBD-1 on SiO<sub>2</sub>/Si

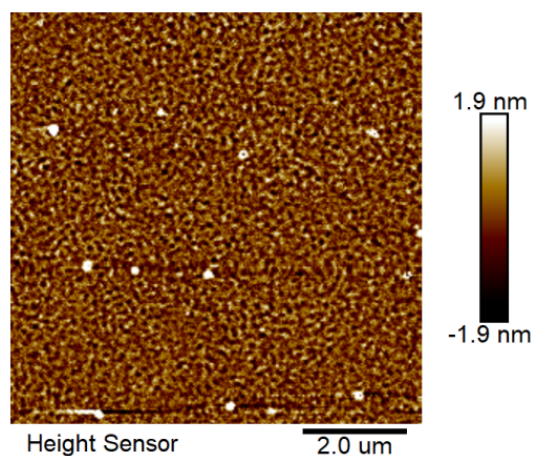

**Figure S1.** AFM image of BUBD-1 on SiO<sub>2</sub>/Si substrate.

### S2. PL of BUBD-1 on different substrates

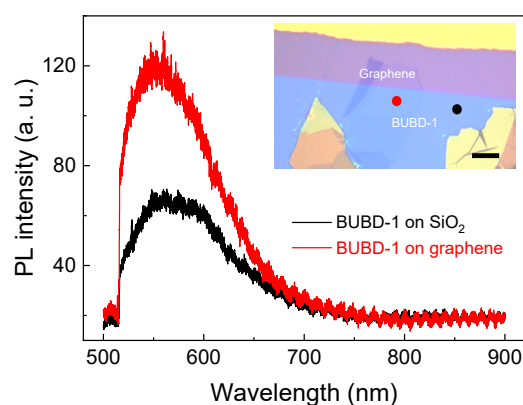

**Figure S2.** Photoluminescence spectra of BUBD-1 (~30 nm) measured at two locations, on graphene (red point, as optical microscopy image in inset) and on SiO<sub>2</sub> substrate (black point). Scale bar, 20 μm. The PL from BUBD-1 on graphene is much stronger, indicating a better crystalline structure.

### S3. Transfer curves and shifts of Dirac point

Figure S3a shows the resistance of hybrid device as a function of gate voltage under illumination (405 nm). For this device, illumination causes the Dirac point to shift to

higher values of  $V_G$ , indicating that photogenerated holes in BUBD-1 are transferred into graphene. Figure S3b summarized the shifts of  $V_D$  as a function of power density.

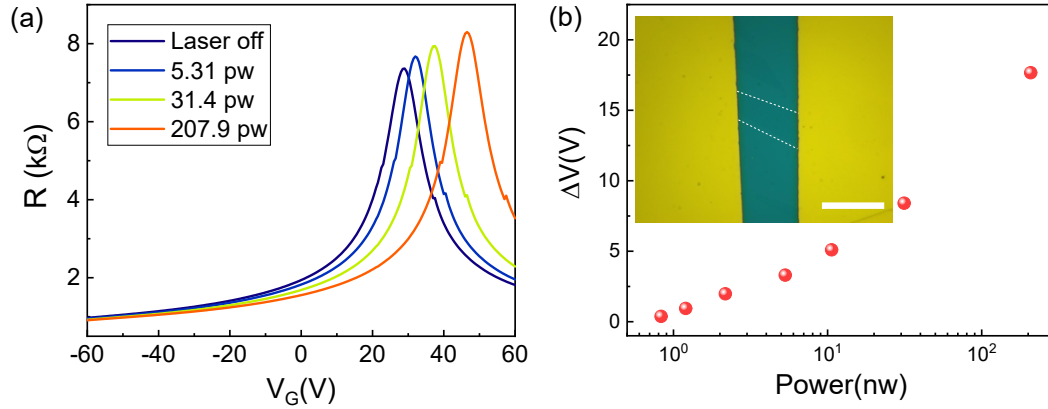

**Figure S3.** (a) Resistance as a function of gate voltage for the graphene/BUBD-1 phototransistor under various optical powers (405 nm laser). (b) Illumination-dependent shift of  $V_D$ . Inset shows the optical image of graphene/BUBD-1 hybrid device. Scale bars: 20  $\mu\text{m}$ .

#### S4. Effect of the gate voltage on photoresponsivity

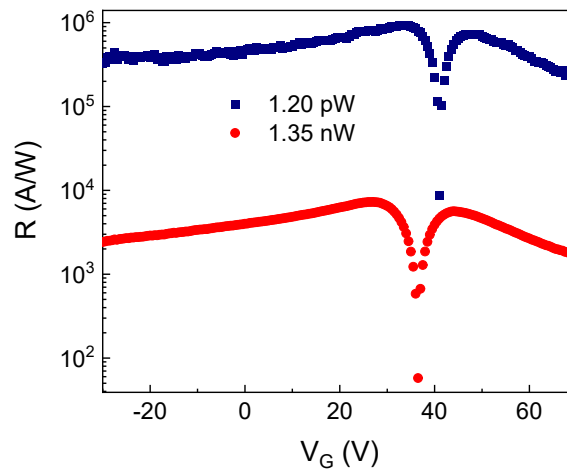

**Figure S4.** Photoresponsivities as a function of gate voltage under different power (405 nm laser).

#### S5. Schematic diagram of test temporal responses setup

**Figure S5.** The schematic diagram of test circuit setup employing a high frequency oscilloscope.

**S6. EQE of the hybrid device for different irradiation**

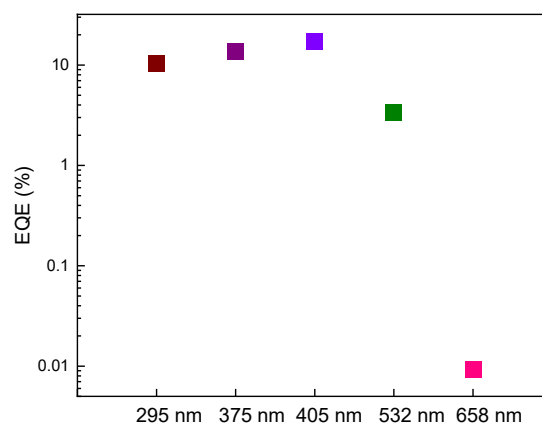

**Figure S6.** EQE of the device for different photon irradiation ( $\sim 1$  nW).

**S7. AFM images of BUBD-1 on CVD graphene**

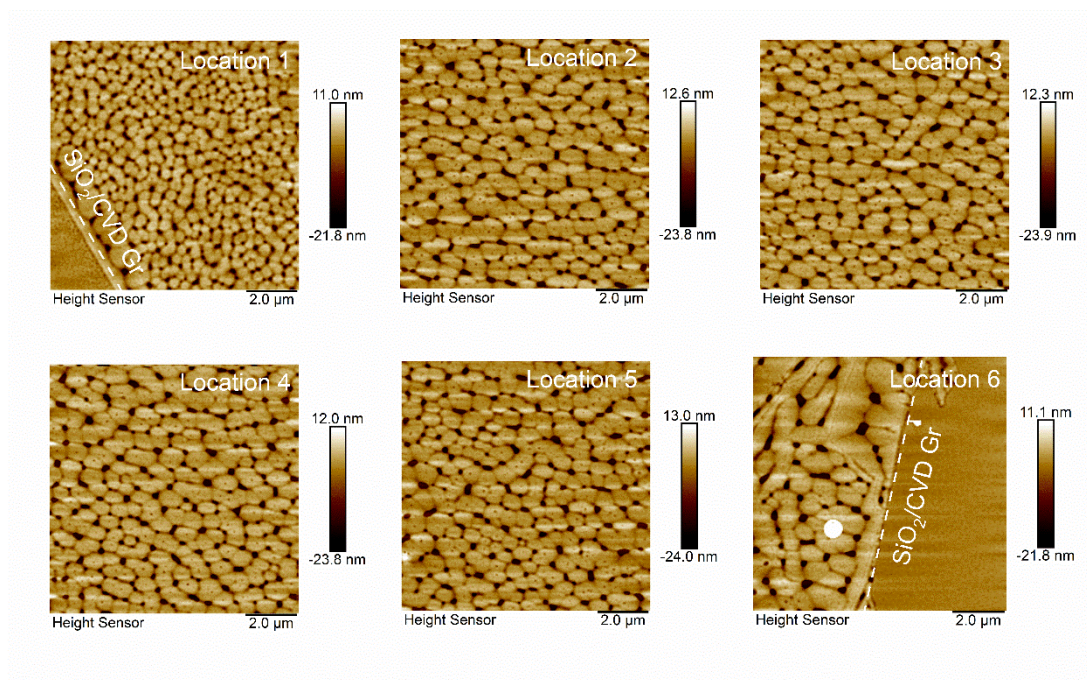

**Figure S7.** AFM images of BUBD-1 on CVD graphene measured random six positions.

### S8. Photoresponse of CVD graphene/BUBD-1 device

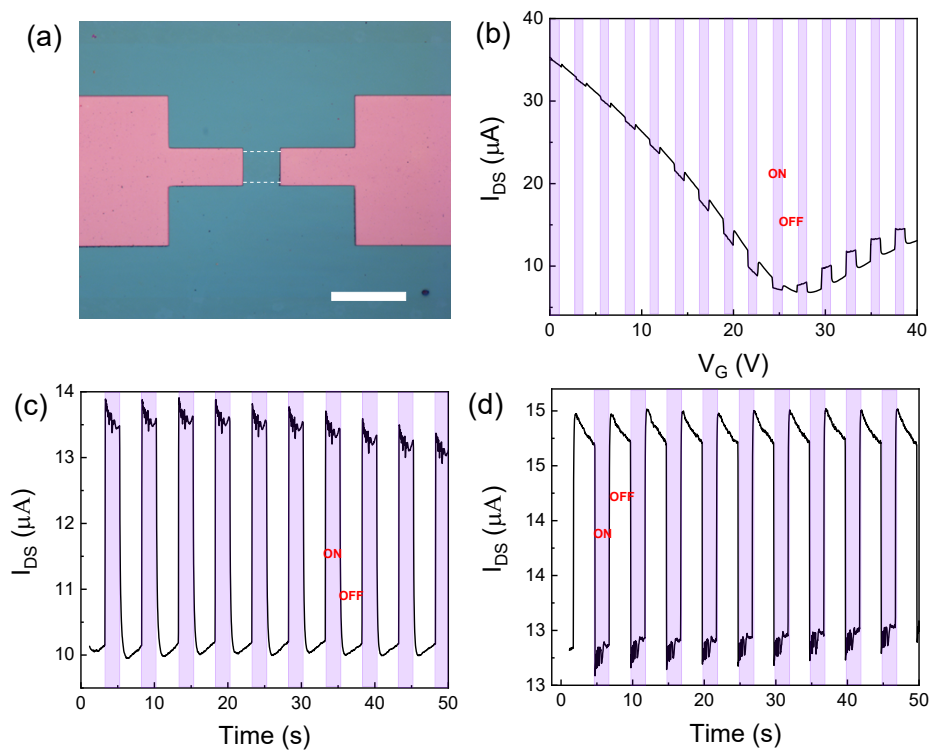

**Figure S8.** Optical microscopy image of the CVD graphene/BUBD-1. (b) Transfer characteristics of the device under dark and illumination. (c) The photocurrent response of the device at  $V_G=20$  V. (c) The photocurrent response of the device at  $V_G=30$  V.
